# Supplementary material
Source: Springer Nature journal article supplement (https://www.springermedizin.de/resource/supplementary/12879_2012_2356_MOESM2_ESM.pdf/9444420)
Supplement: MOESM2 [file 9444420]

4212 patients screened for eligibility

4066 patients excluded who did not meet inclusion criteria

146 patients with severe sepsis or septic shock included

5 patients excluded due to incomplete data set

141 patients included in the final data analysis
